# Supplementary material for: Benzoxazole-polymer@CCTO hybrid nanoparticles prepared via RAFT polymerization: toward poly(p-phenylene benzobisoxazole) nanocomposites with enhanced high-temperature dielectric properties
Source: Royal Society of Chemistry journal article supplement (doi:10.1039/d1ta08604a), 2021-01-01
Supplement: d1ta08604a1.pdf [file d1ta08604a1.pdf]

## Supporting Information

**Benzoxazole-polymer@CCTO hybrid nanoparticles prepared via  
RAFT polymerization: toward poly(*p*-phenylene benzobisoxazole)  
nanocomposites with enhanced high-temperature dielectric  
properties**

Junhao Jiang, Jinpeng Li, Jun Qian, Xiaoyun Liu, Peiyuan Zuo\*, You Yuan, Qixin Zhuang\*

Key Laboratory of Advanced Polymer Materials of Shanghai, School of Material Science and Engineering, East China University of Science and Technology, Shanghai 200237, P.R China

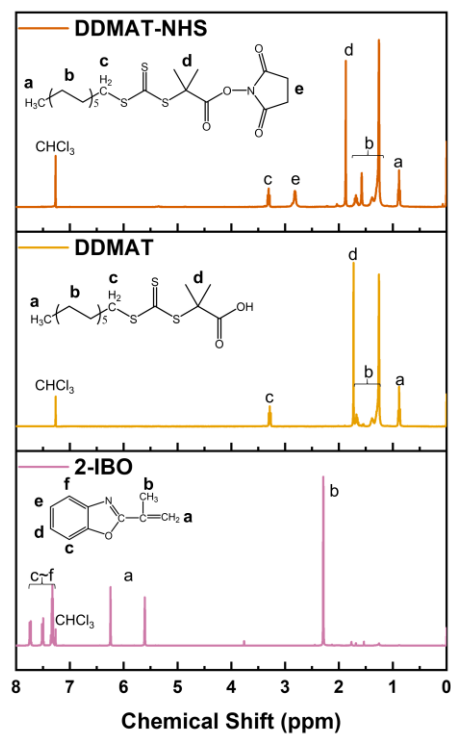

**Figure S1**  $^1\text{H}$  NMR spectra of 2-IBO, DDMAT, and DDMAT-NHS.

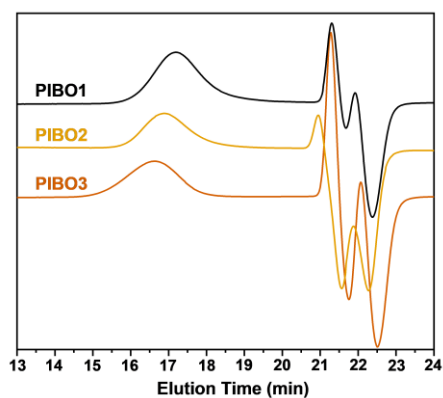

**Figure S2** GPC traces of the benzoxazole-polymer cleaved from different core-shell structured benzoxazole-polymer@CCTO nanoparticles.

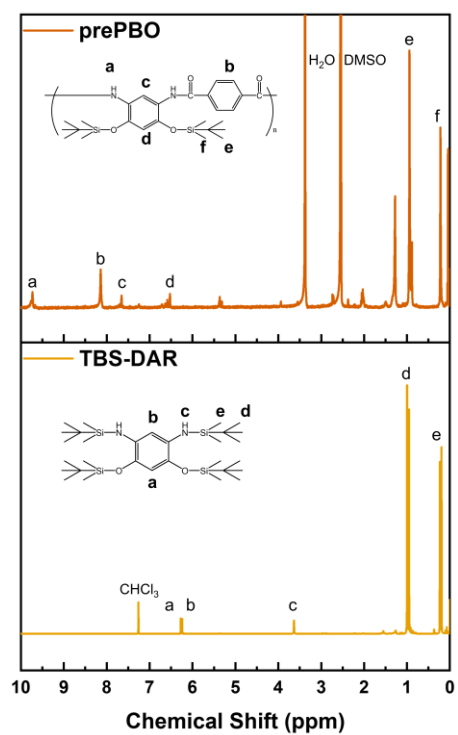

**Figure S3**  $^1\text{H}$  NMR spectra of TBS-DAR and prePBO.

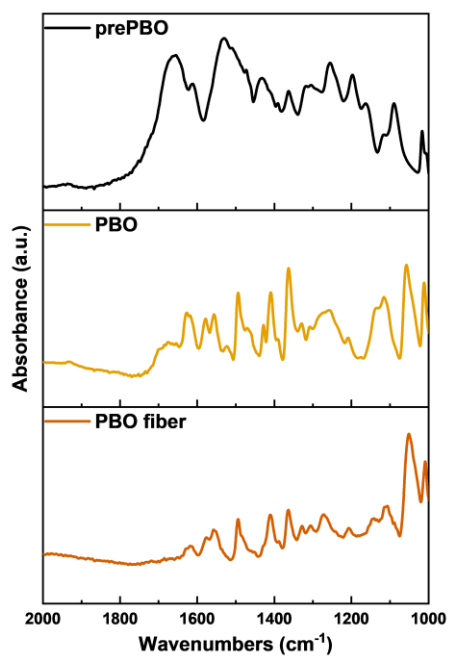

**Figure S4** FTIR spectra of prePBO, PBO, and PBO fiber.

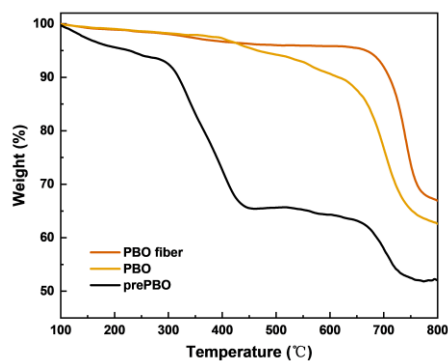

**Figure S5** TGA curves of prePBO, PBO, and PBO fiber.

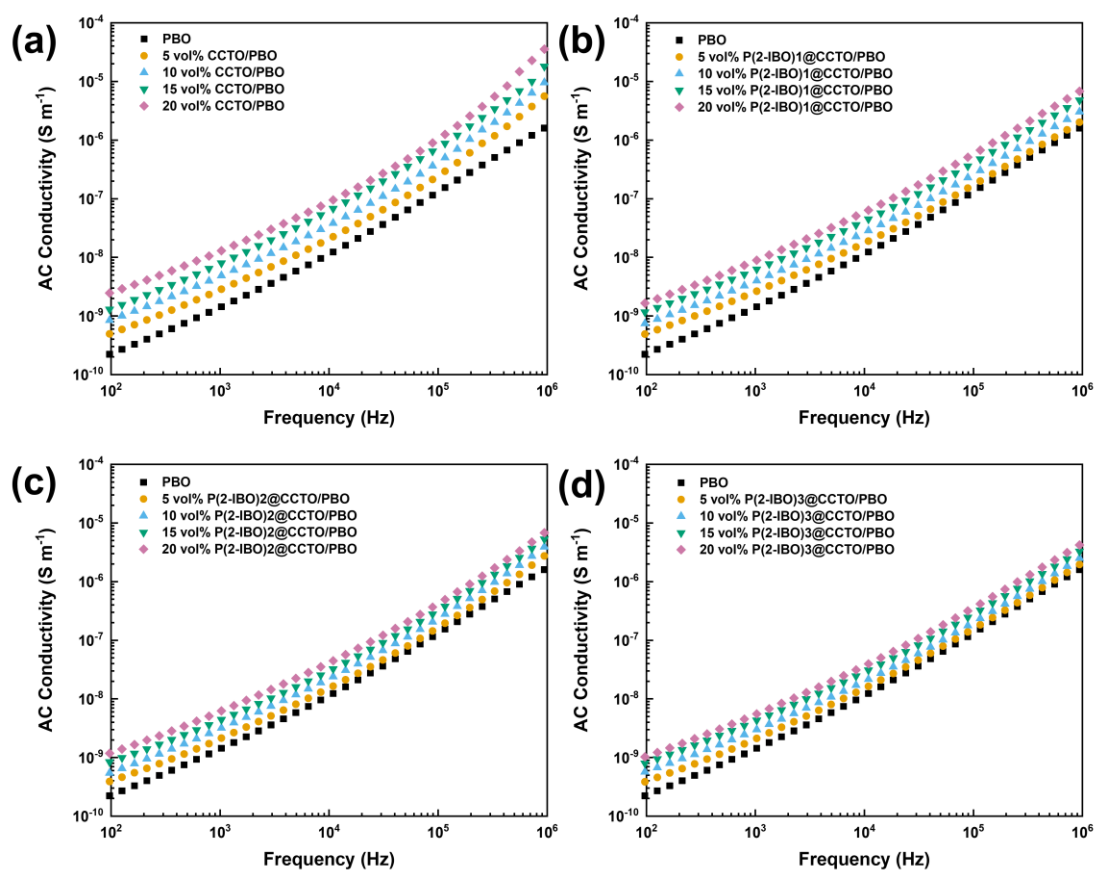

**Figure S6** Frequency dependence of ac conductivity of the PBO-based nanocomposite films with (a) CCTO, (b) P(2-IBO)1@CCTO, (c) P(2-IBO)2@CCTO, and (d) P(2-IBO)3@CCTO.

**Table S1** The dielectric properties of the prepared composites and some reported materials

| Matrix | Fillers                                                  | Breakdown strength (KV mm <sup>-1</sup> ) | Discharge energy density (J cm <sup>-3</sup> ) under 200 KV mm <sup>-1</sup> | Dielectric thermal stability (°C) | Ref.      |
|--------|----------------------------------------------------------|-------------------------------------------|------------------------------------------------------------------------------|-----------------------------------|-----------|
| PES    | 10 vol% BT-HCuPc                                         | 310                                       | 0.4 (25 °C)                                                                  | 25-150                            | S1        |
| c-BCB  | 10 vol% BNNs                                             | 447                                       | 0.6 (25 °C)                                                                  | 25-300                            | S2        |
| c-BCB  | 7.5 vol% Al <sub>2</sub> O <sub>3</sub> -NPLs            | 489                                       | 0.6 (150 °C)                                                                 | 25-200                            | S3        |
| PI     | 7 vol% Al <sub>2</sub> O <sub>3</sub>                    | 422                                       | 0.7 (150 °C)                                                                 | 25-200                            | S4        |
| PI     | 5 vol% HfO <sub>2</sub>                                  | 397                                       | 0.8 (150 °C)                                                                 | 25-200                            | S4        |
| PI     | 1 vol% TiO <sub>2</sub>                                  | 342                                       | 0.8 (150 °C)                                                                 | 25-200                            | S4        |
| PEI    | 11 vol% Al <sub>2</sub> O <sub>3</sub> @ZrO <sub>2</sub> | 615                                       | 0.9 (25 °C)                                                                  | 25-200                            | S5        |
| PBO    | 10 vol% P(2-IBO) <sub>3</sub> @CCTO                      | 337                                       | 1.67 (25 °C)                                                                 | 25-200                            | This work |

## Reference

1. W. Xu, G. Yang, L. Jin, J. Liu, Y. Zhang, Z. Zhang and Z. Jiang, *ACS Appl. Mater. Interfaces*, 2018, **10**, 11233-11241.
2. Q. Li, L. Chen, M. R. Gadinski, S. Zhang, G. Zhang, U. Li, E. Iagodkine, A. Haque, L. Q. Chen, N. Jackson and Q. Wang, *Nature*, 2015, **523**, 576-579.
3. H. Li, D. Ai, L. Ren, B. Yao, Z. Han, Z. Shen, J. Wang, L. Q. Chen and Q. Wang, *Adv. Mater.*, 2019, **31**, 1900875.
4. D. Ai, H. Li, Y. Zhou, L. Ren, Z. Han, B. Yao, W. Zhou, L. Zhao, J. Xu and Q. Wang, *Adv. Energy Mater.*, 2020, **10**, 1903881.
5. L. Ren, H. Li, Z. Xie, D. Ai, Y. Zhou, Y. Liu, S. Zhang, L. Yang, X. Zhao, Z. Peng, R. Liao and Q. Wang, *Adv. Energy Mater.*, 2021, **11**, 2101297.
